# Supplementary material for: Oat protein isolate-Pleurotus ostreatus β-glucan conjugate nanoparticles bound to β-carotene effectively alleviate immunosuppression by regulating gut microbiota
Source: Royal Society of Chemistry journal article supplement (doi:10.1039/d3fo05158g), 2024-01-01
Supplement: d3fo05158g1.pdf [file d3fo05158g1.pdf]

**Oat protein isolate-*Pleurotus ostreatus*  $\beta$ -glucan conjugate nanoparticles bound to  $\beta$ -carotene effectively alleviate immunosuppression by regulating gut microbiota**

Lei Zhong<sup>a</sup>, Qiuhui Hu<sup>b,\*</sup>, Qiping Zhan<sup>a</sup>, Mingwen Zhao<sup>c</sup>, Liyan Zhao<sup>a</sup>

<sup>a</sup>College of Food Science and Technology, Nanjing Agricultural University, Nanjing 210095, P.R. China.

<sup>b</sup>College of Food Science and Engineering, Nanjing University of Finance and Economics, Nanjing 210023, P.R. China.

<sup>c</sup>College of Life Sciences, Nanjing Agricultural University, Nanjing 210095, P.R. China.

**\*Corresponding author**

\*qiuhuihu@nufe.edu.cn

**Figure S1.** TEM images of  $\beta$ -carotene nanoparticles stabilized by OPI, OPI-POG

mixture and OPI-POG conjugate before digestion (the scale bar represents 200 nm).

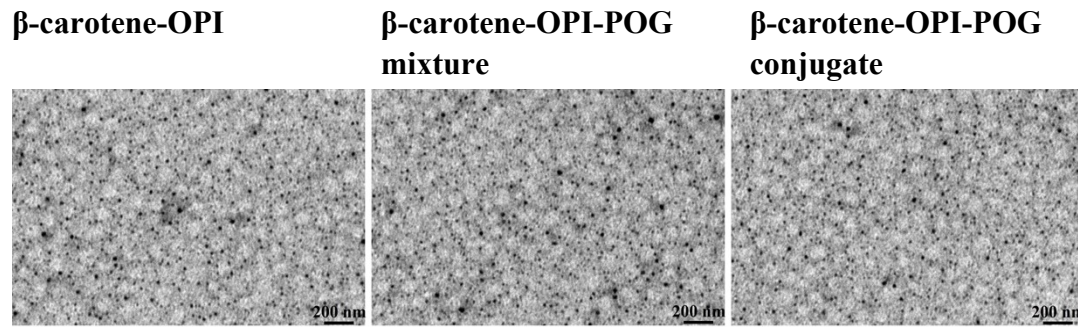

**Figure S2.** Venn diagrams of 80 OTUs altered by  $\beta$ -carotene, OPI-POG conjugate nanoparticles, and  $\beta$ -carotene-OPI-POG conjugate nanoparticles.  $\uparrow$  indicates increased by  $\beta$ -carotene, OPI-POG conjugate nanoparticles, and  $\beta$ -carotene-OPI-POG conjugate nanoparticles.  $\downarrow$  indicates decreased by  $\beta$ -carotene, OPI-POG conjugate nanoparticles, and  $\beta$ -carotene-OPI-POG conjugate nanoparticles. Red font:  $\beta$ -carotene, OPI-POG conjugate nanoparticles, and  $\beta$ -carotene-OPI-POG conjugate nanoparticles reversed OTU whose abundance was changed by CTX.

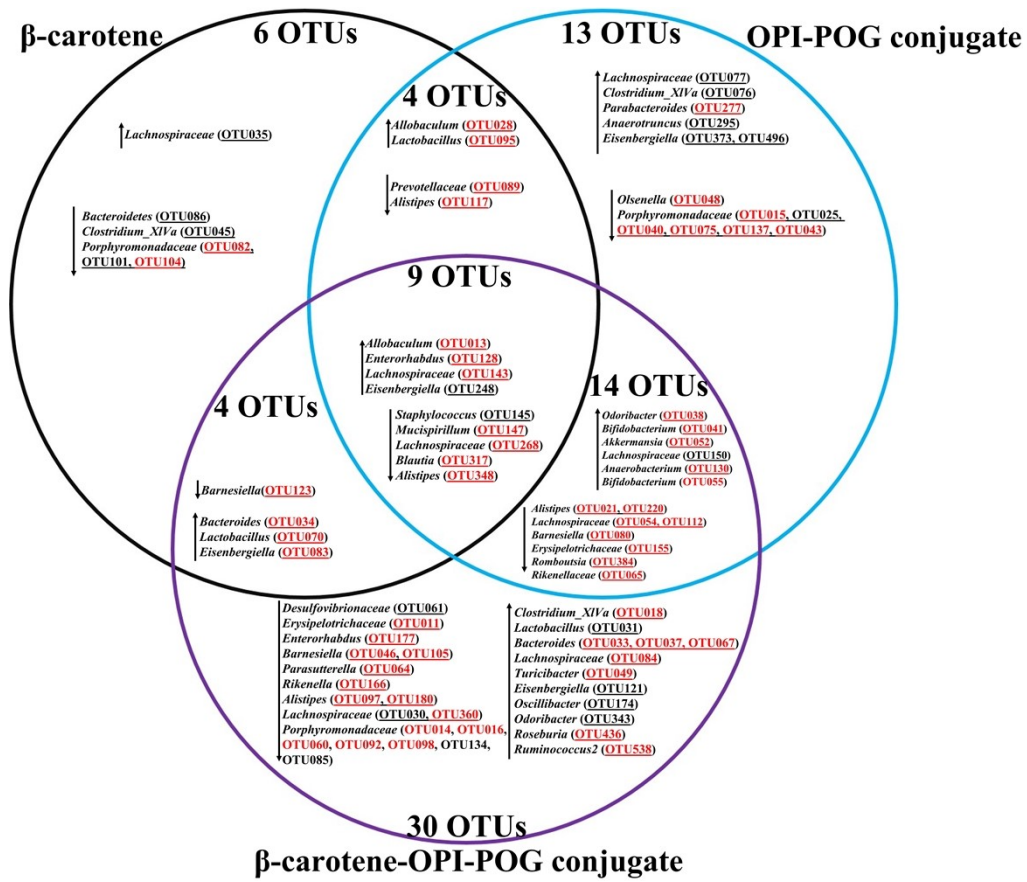

**Table S1.** Procedure of reversed phase HPLC for determining  $\beta$ -carotene and retinoids content

|                             |                                                                                                                                                                                                                                        |
|-----------------------------|----------------------------------------------------------------------------------------------------------------------------------------------------------------------------------------------------------------------------------------|
| <b>Equipment</b>            | (1) Alliance HPLC System equipped with 2998 PDA Detector (E2695, Waters, Milford, MA)<br>(2) A COSMOSIL Cholester packed column ( $250 \times 4.6$ mm ID, 5 $\mu$ m) with a Cholester guard column ( $10 \times 4.6$ mm ID, 5 $\mu$ m) |
| <b>Mobile phase</b>         | (1) Solvent A: 84% methanol:<br>14% acetonitrile: 2% ultra-pure grade water, v/v/v<br>(2) Solvent B: dichloromethane                                                                                                                   |
| <b>Gradient program</b>     | Solvent A: 80%-45% in 15 min, 45% for 5 min, 45%-80% in 5min, held at 80% for 3 min until injection of the next sample.                                                                                                                |
| <b>Injection volume</b>     | 20 $\mu$ L                                                                                                                                                                                                                             |
| <b>Flow rate</b>            | 1 mL/min                                                                                                                                                                                                                               |
| <b>Column temperature</b>   | 10 $^{\circ}$ C                                                                                                                                                                                                                        |
| <b>Detection wavelength</b> | PDA detector, $\beta$ -carotene (450 nm), retinol and retinyl palmitate (340 nm).                                                                                                                                                      |

**Table S2.** Procedure of gas chromatography for determining SCFAs content

|                       |                                                                                                                                      |
|-----------------------|--------------------------------------------------------------------------------------------------------------------------------------|
| <b>Equipment</b>      | Agilent HP-INNOWAX capillary column ( $30 \text{ m} \times 0.25 \text{ mm} \times 0.25 \mu\text{m}$ )<br>a flame ionization detector |
| <b>Procedure</b>      |                                                                                                                                      |
| Flow rate of nitrogen | 19 mL/min                                                                                                                            |
| Program               | ① at $100^{\circ}\text{C}$ for 1 min<br>② at $180^{\circ}\text{C}$ (5 $^{\circ}\text{C}/\text{min}$ ) for 4 min                      |
| Injection volume      | 1.0 $\mu$ L                                                                                                                          |
| Makeup gas            | air: 260 mL/min<br>hydrogen: 30 mL/min<br>nitrogen: 30 mL/min                                                                        |
